# Supplementary material for: PI3Kδ activity controls plasticity and discriminates between EMT and stemness based on distinct TGFβ signaling
Source: PubMed Central journal article supplement (PMC9314410; doi:10.1038/s42003-022-03637-w), 2022-07-25
Supplement: 42003_2022_3637_MOESM1_ESM.pdf [file 42003_2022_3637_MOESM1_ESM.pdf]

a)

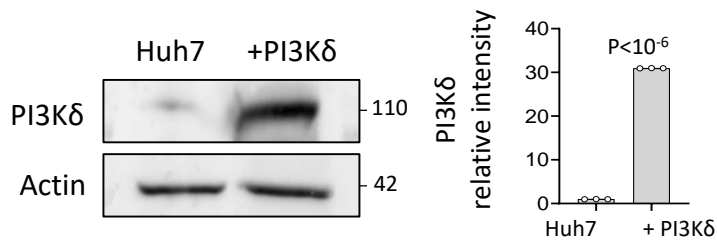

b)

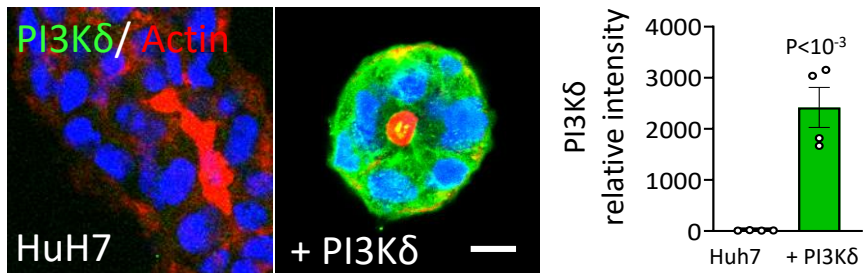

c)

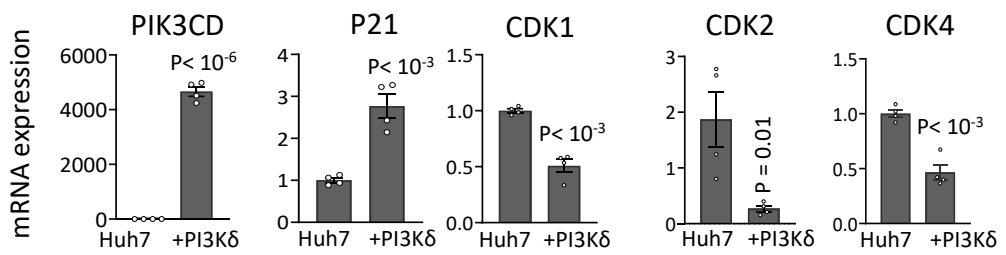

d)

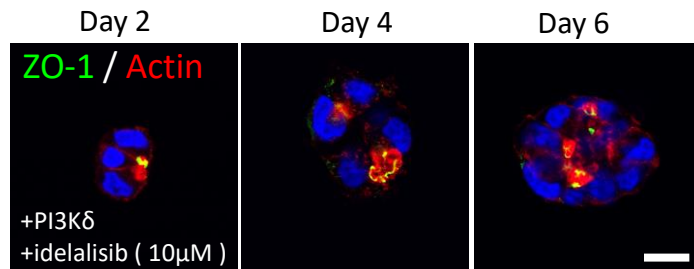

**Supplementary Figure 1. PI3K $\delta$  induces of rosette-like structures is associated with a decrease of cell proliferation markers and is dependant on its kinase activity**

**a)** Immunoblot analysis of PI3K $\delta$  in Huh7 control and Huh7+PI3K $\delta$  with the quantification of its relative intensity (right, n= 3 experiments). **b)** Immunofluorescence staining for PI3K $\delta$  (green), actin microfilaments using phalloidin (red) and nuclei (blue) in Huh7 control and Huh7+PI3K $\delta$  organoids after 6 days of 3D culture. Scale bar: 10 $\mu$ m. Quantification of the relative intensity (right). Each dot of the graph corresponds to an organoid. **c)** RT-qPCR analysis of different genes expression performed in Huh7 and Huh7+PI3K $\delta$  organoids after 6 days of 3D culture in two independent experiments performed in duplicate. RPLP0 was used as the housekeeping gene for normalization. **d)** Time-course analysis of lumen formation in Huh7+PI3K $\delta$  organoids treated or not with 10 $\mu$ M of CAL-101 and stained for Zonula-occludens 1 (ZO-1) antibody (green), actin microfilaments using phalloidin (red) and nuclei using Hoechst (blue) after 2, 4 or 6 days of 3D culture. Scale bar: 10  $\mu$ m. All values are expressed as mean $\pm$ S.E.M.

a)

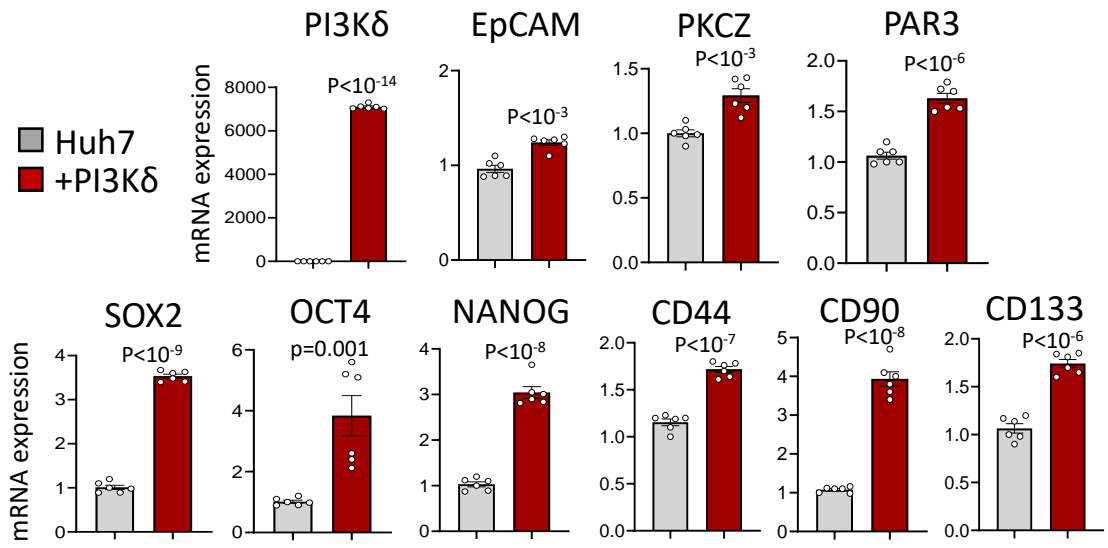

b)

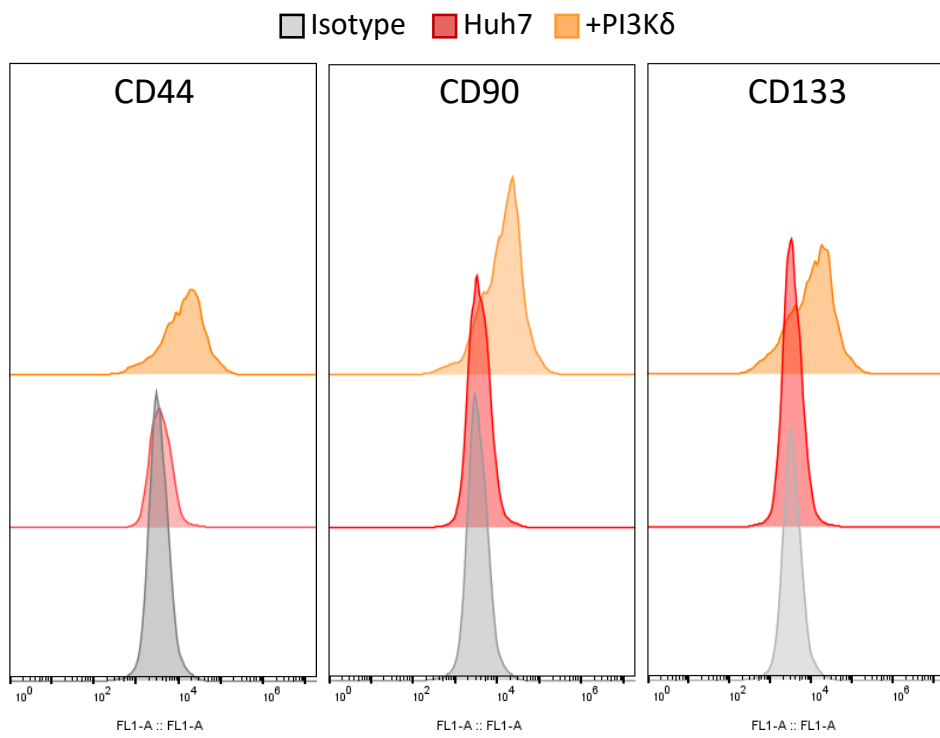

## **Supplementary Figure 2. PI3K $\delta$ induced an activation of progenitors markers**

**a)** RT-qPCR analysis of different genes expression performed in Huh7 and Huh7+PI3K $\delta$  (n = 2 independent experiments performed in triplicate). **b)** Flow cytometry analysis of CD44, CD90 and CD133 at plasma membrane in Huh7 and Huh7+PI3K $\delta$ . All values are expressed as mean $\pm$ S.E.M.

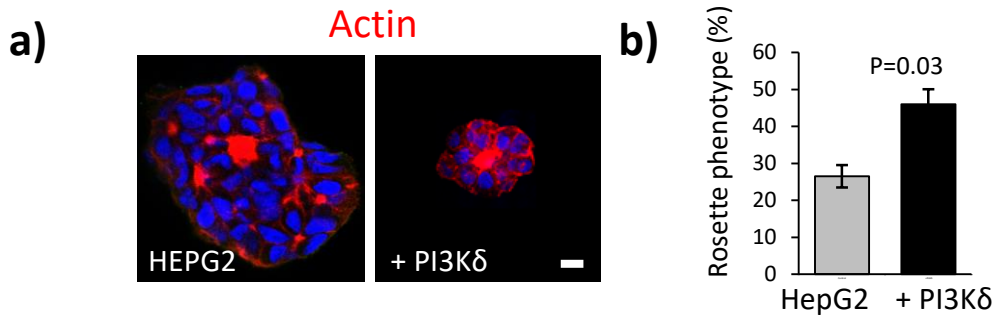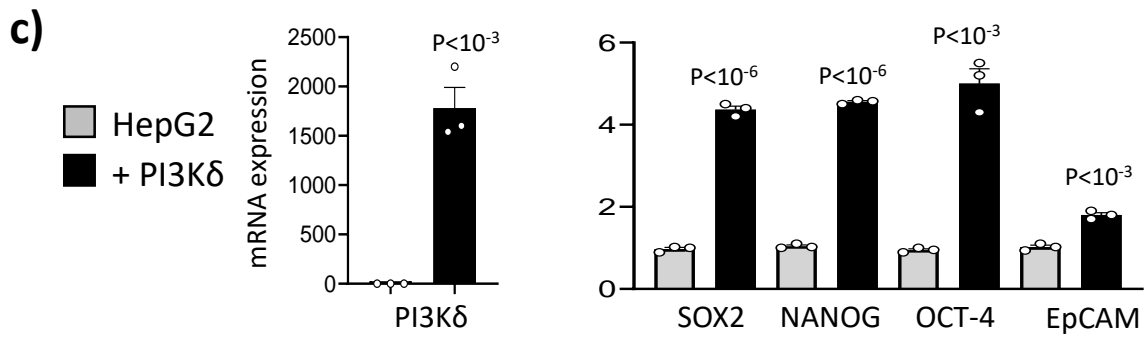

**Supplementary Figure 3. PI3K $\delta$  overexpression induces rosette-like structures and stemness factors in HepG2 cells**

**a)** Immunofluorescence staining for the actin microfilaments using phalloidin (red) and nuclei (blue) in HepG2 cells transfected or not with a plasmid coding for PI3K $\delta$  (+PI3K $\delta$ ) after 6 days of 3D culture. Scale bar: 10  $\mu$ m. **b)** Quantification of rosette forming (percentage) between the two conditions after 6 days of 3D culture. **c)** RT-qPCR analysis of different genes expression performed in HepG2 and HepG2+PI3K $\delta$ . (n=3 independent experiments). GADPH was used as housekeeping gene for normalization. All values are expressed as mean $\pm$ S.E.M.

**a)**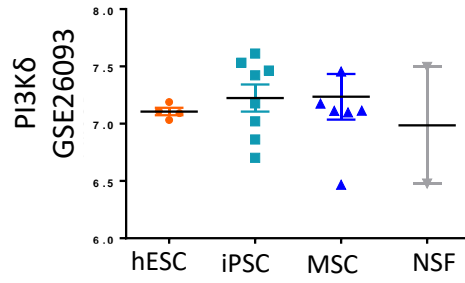**b)**

Primary human hepatocytes (Hep)  $\xrightarrow{\text{GSE23034}}$  Induced pluripotent stem cells (IPS)

■ Hep  
■ IPS

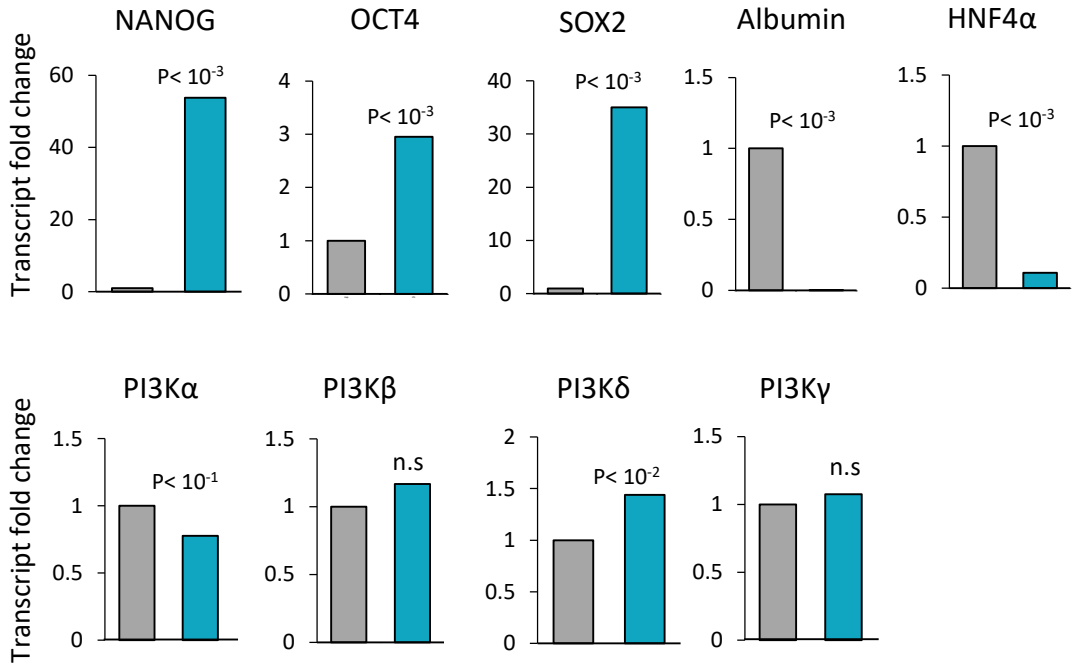

#### **Supplementary Figure 4. Expression profile of PI3K $\delta$ in stem cells**

**a)** Expression of PI3K $\delta$  in human embryonic stem cell (hESC), induced-pluripotent stem cell (iPSC), mesenchymal stem cell (MSC) and fibroblasts using the dataset GSE26093. **b)** Fold change in the expression of the several stem cell, differentiation markers and different class I PI3K isoforms (PI3K $\delta$ , PI3K $\alpha$ , PI3K $\beta$ , PI3K $\gamma$ ) in hepatocyte and iPS cells using the dataset GSE23034.



**a)** Human Embryonic Stem cells Hepatocyte-like cells

Day 1 Day 21

Transcriptomic analysis

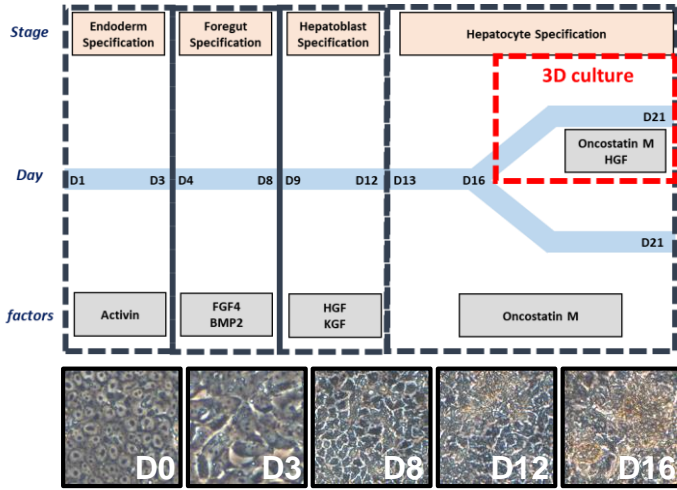

**b)**

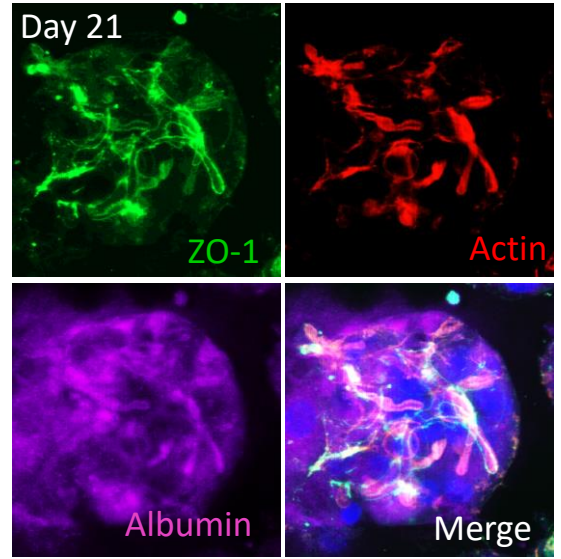

**c)**

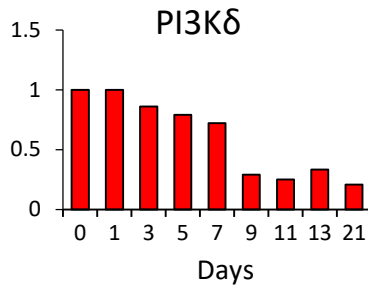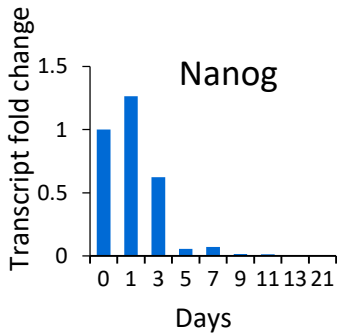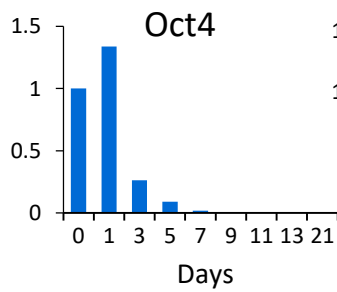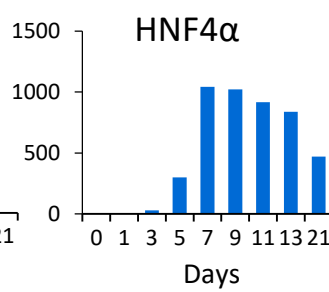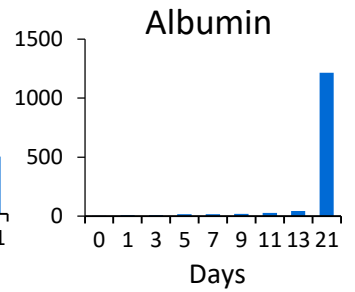

**d)**

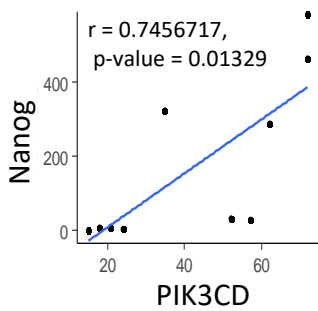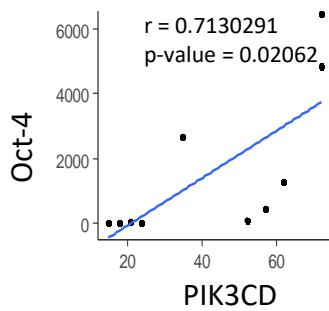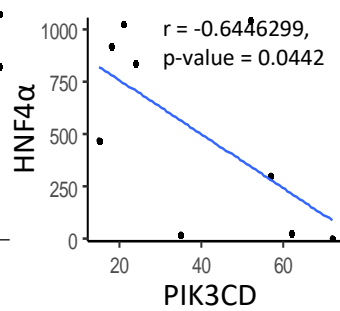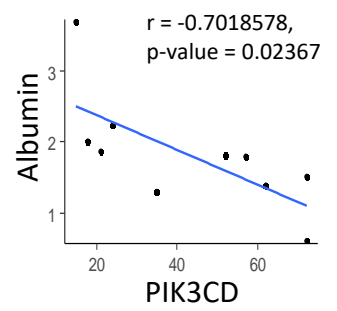

## **Supplementary Figure 5. Expression profile of PI3K $\delta$ during hESC differentiation**

**a)** Experiment plan for hESC differentiation into hepatocyte-like cells. **b)** 3D reconstruction of an organoid formed after 6 days of 3D culture, from cell plated at day 16 of their differentiation. Organoids were stained for Zonula-occludens 1 (ZO-1, green), actin microfilaments using phalloidin (red), albumin (purple) and nuclei (blue). **c)** Transcription profile of different markers during hESC differentiation into hepatocyte-like cells. **d)** Correlation between expressions of the genes showed in panel (c) and PI3K $\delta$  expression.

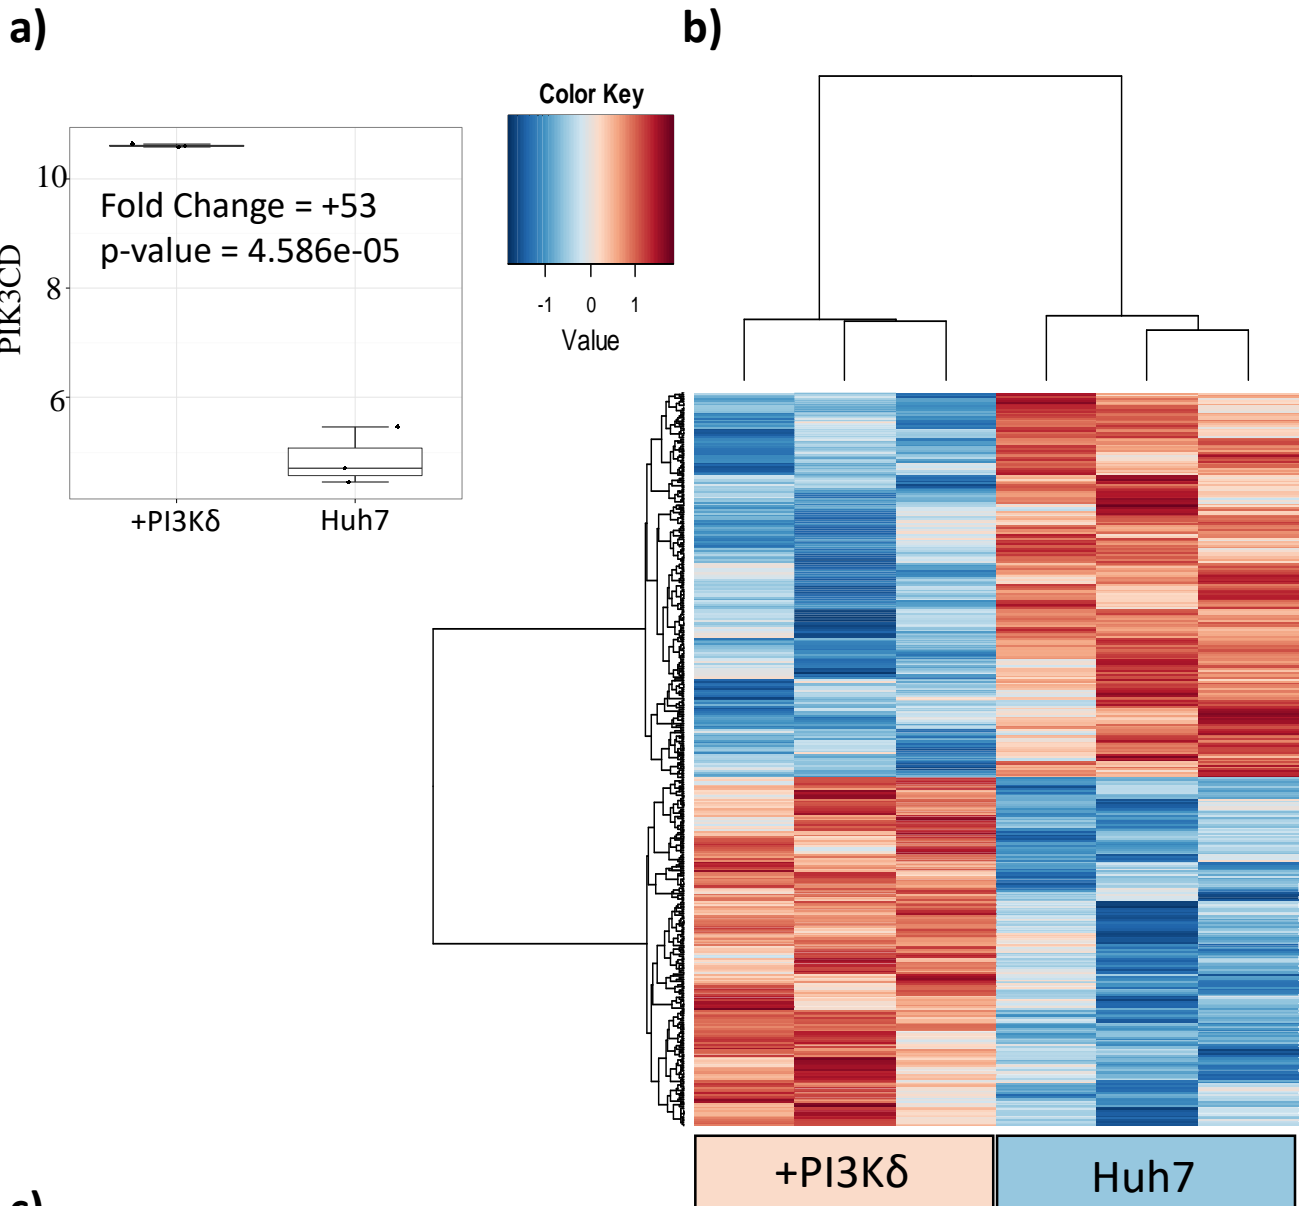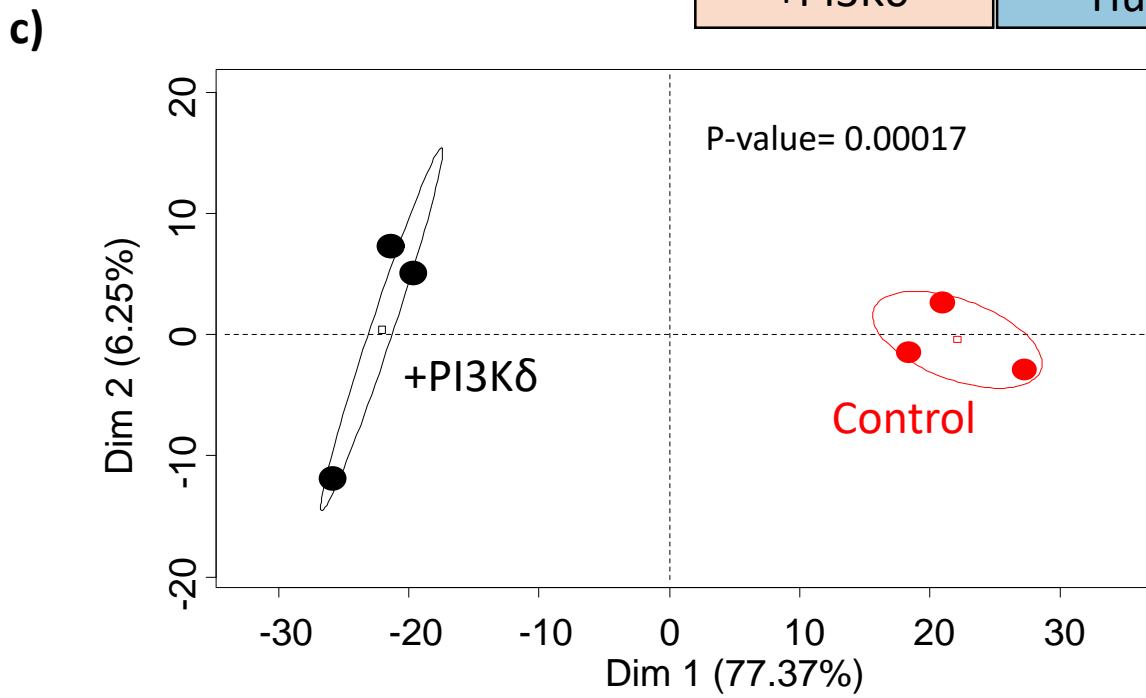

## **Supplementary Figure 6. Transcriptomic analysis of Huh7 overexpressing PI3K $\delta$**

**a)** Boxplot of PI3K $\delta$  expression in Huh7 control and Huh7+PI3K $\delta$  found in the transcriptomics analysis. **b)** Heatmap of the 312 upregulated and 348 down-regulated genes in Huh7+PI3K $\delta$  and unsupervised classification performed on the gene expression profiling between the two conditions. **c)** Unsupervised principal component analysis performed on the gene expression profiling in Huh7 and Huh7+PI3K $\delta$  (the p-value was calculated with group correlation to the first principal axis).

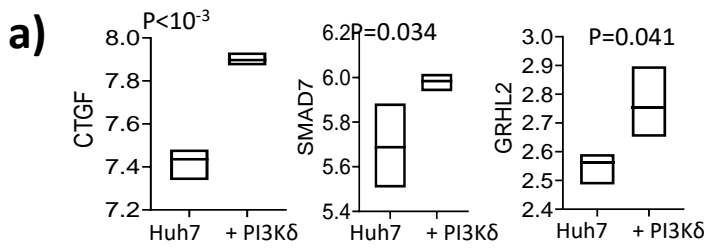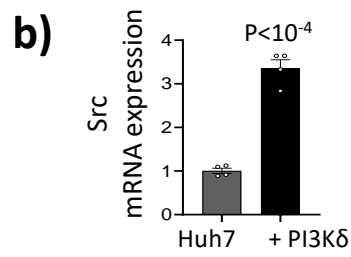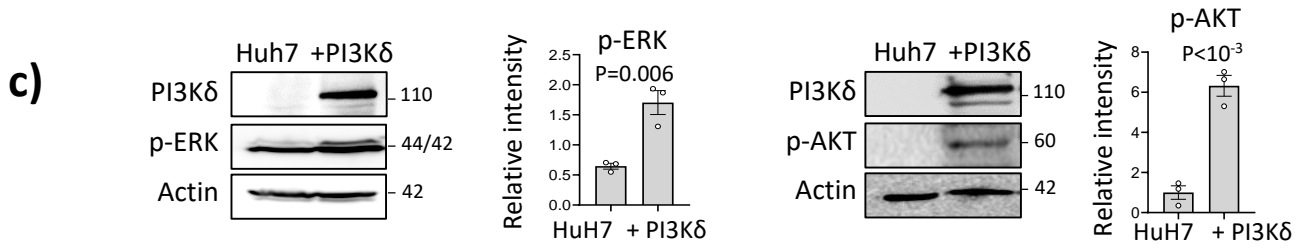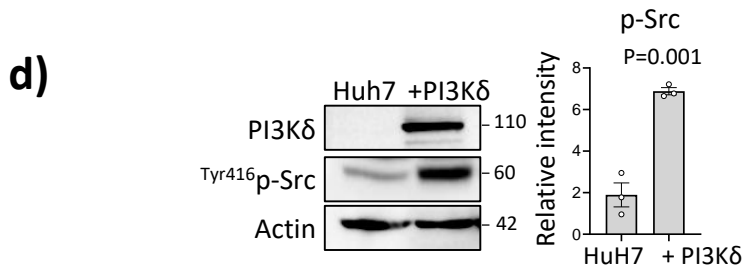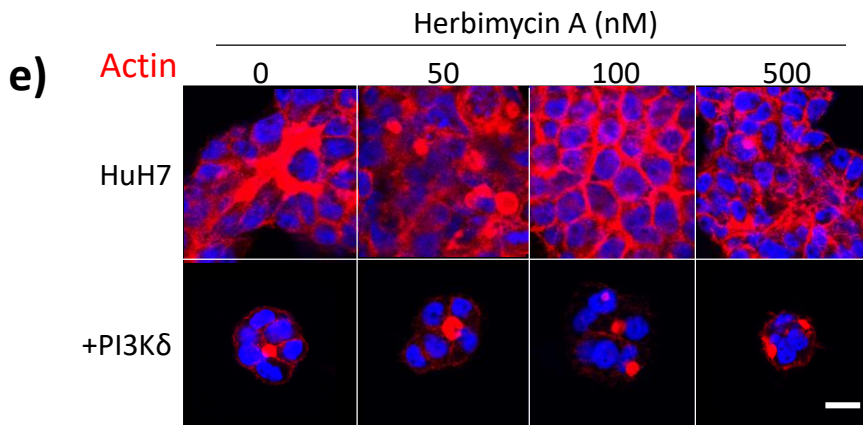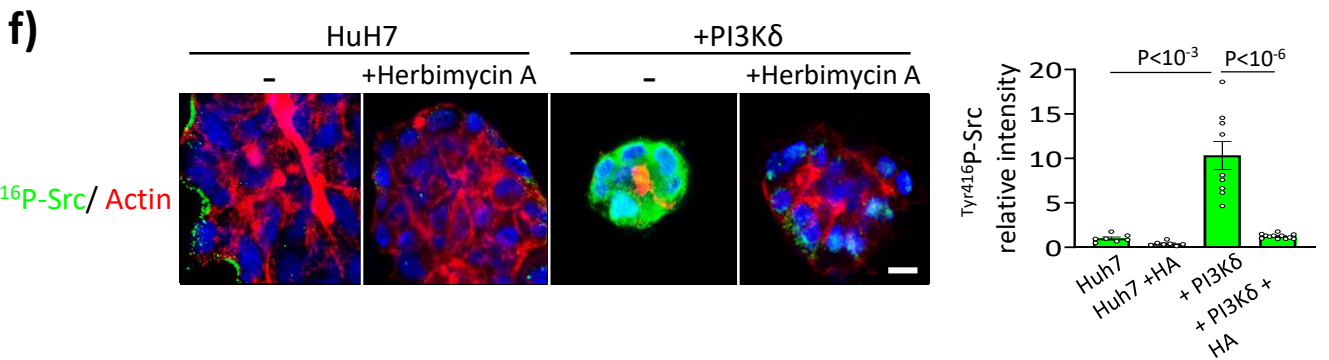

**Supplementary Figure 7. Effects of Src signaling pathway inhibition on PI3K $\delta$  induced rosette-like structures.**

**a)** Boxplot of CTGF, SMAD7 and GRHL2 expression in the transcriptome from a Huh7 and Huh7+PI3K $\delta$  (the p-value was calculated using an unpaired two-sided Student's t test) based on 10 p-values. **b)** RT-qPCR analysis of SRC expression performed in Huh7 and Huh7+PI3K $\delta$  organoids after 6 days of 3D culture in two independent experiments performed in duplicate. RPLP0 was used as the housekeeping gene for normalization. **c)** Immunoblot analysis of p-ERK and p-AKT in Huh7 and Huh7+PI3K $\delta$  with the quantification of the relative intensity (n=3 experiments). **d)** Immunoblot analysis of p-Src in Huh7 and Huh7+PI3K $\delta$  with the quantification of the relative intensity (n=3 experiments). **e)** Immunofluorescence staining for actin microfilaments using phalloidin (red) and nuclei (blue) in Huh7 control and Huh7+PI3K $\delta$  organoids after 6 days of 3D culture treated or not with the Src inhibitor (Herbimycin A) at different concentrations (0-500 nM) as indicated in the panel. Scale bar: 10  $\mu$ m. **f)** Immunofluorescence staining after 6 days of 3D culture for p-SRC (green), actin microfilaments using phalloidin (red) and nuclei (blue) in Huh7 control and Huh7+PI3K $\delta$  organoids treated or not with herbimycin A (Src inhibitor) at 100 nM. Quantification of its relative intensity (right). Each dot of the graph corresponds to an organoid. Scale bar: 10 $\mu$ m.

a)

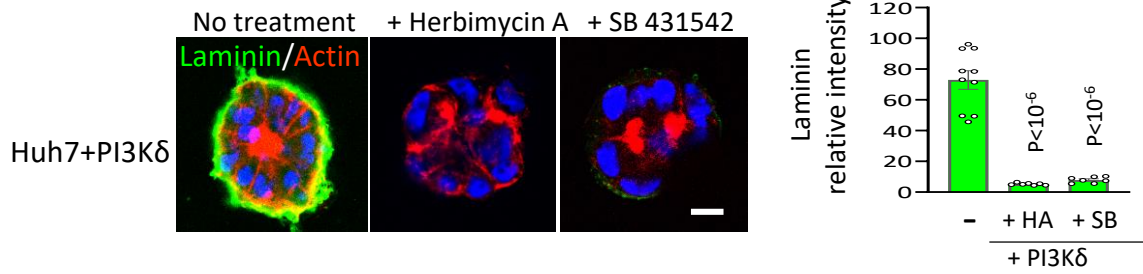

b)

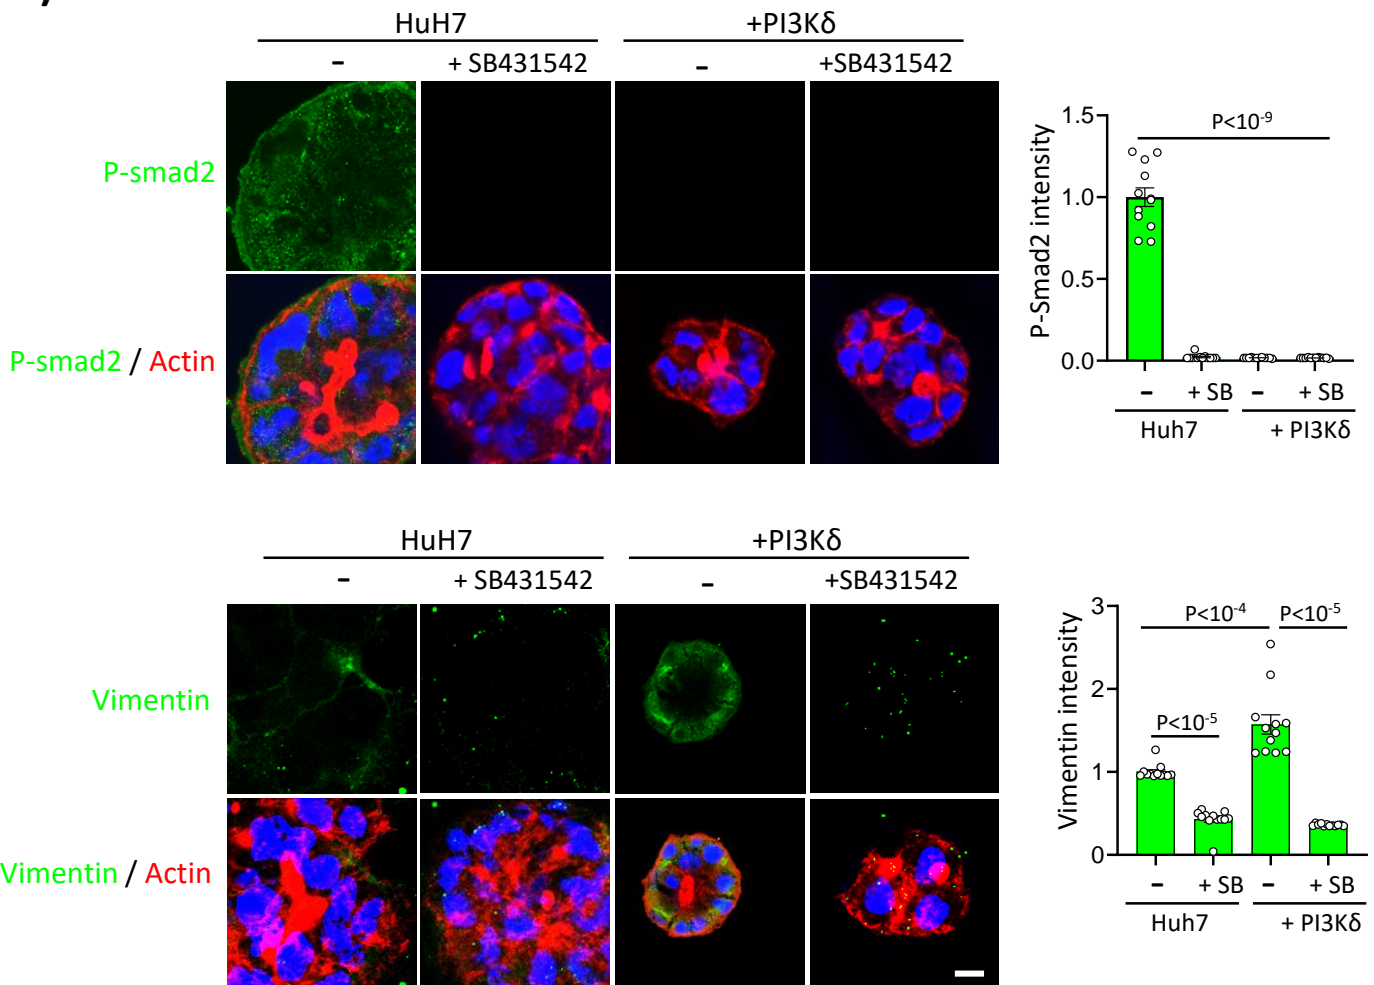

**Supplementary Figure 8. Effects of TGF $\beta$  signaling pathway inhibition on PI3K $\delta$  induced rosette-like structures.**

**a)** Immunofluorescence staining for laminin (green), actin microfilaments using phalloidin (red) and nuclei (blue) of Huh7+PI3K $\delta$  organoids treated with 100 nM of Herbimycin A or 2  $\mu$ M of SB431542 after 6 days of 3D culture. Scale bar: 10  $\mu$ m. Quantification of the relative intensity (right). Each dot of the graph corresponds to an organoid. All values are expressed as mean $\pm$ S.E.M. **b)** Immunofluorescence staining after 6 days of 3D culture for p-Smad2 or Vimentin (green), actin microfilaments using phalloidin (red) and nuclei (blue) in Huh7 control and Huh7+PI3K $\delta$  organoids treated or not with SB431542 (TGF $\beta$  inhibitor) at 2  $\mu$ M. Scale bar: 10 $\mu$ m. Quantification of the relative intensity (right). Each dot of the graph corresponds to an organoid. All values are expressed as mean $\pm$ S.E.M.



a)

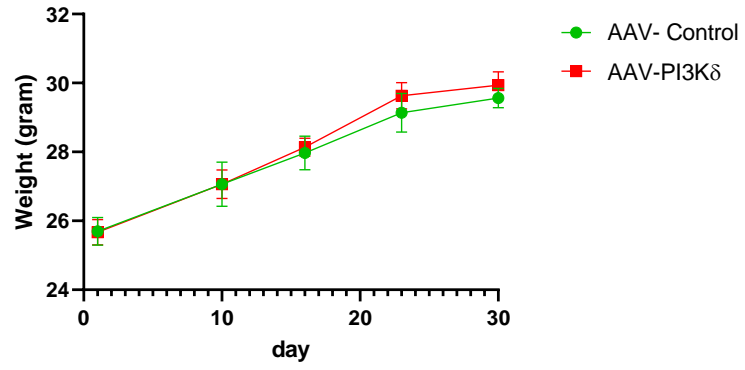

b)

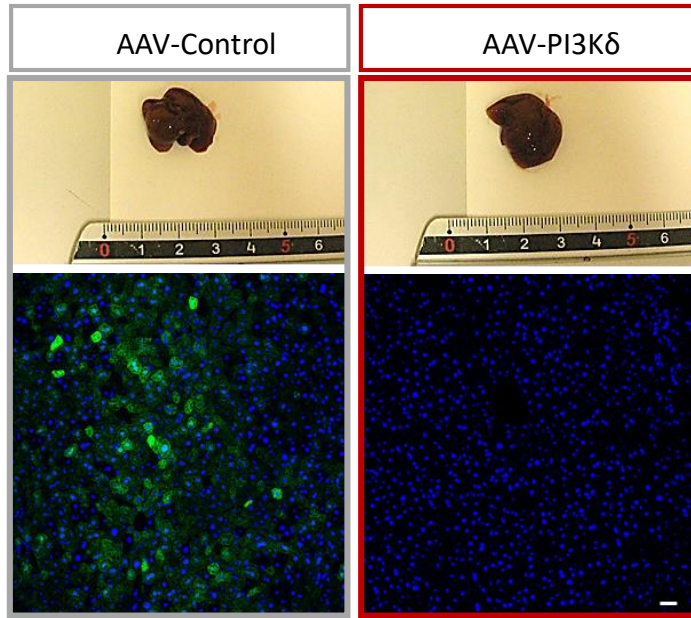

## **Supplementary Figure 9. Effect of PI3K $\delta$ overexpression in mouse liver**

- a)** Analysis of the weight gain between AAV-control and AAV- PI3K $\delta$  mice (n= 4 mice per condition).
- b)** (Top) Liver of mice infected AAV-Control and AAV-PI3K $\delta$ . (Bottom) immunofluorescence staining of EGFP in the two conditions.

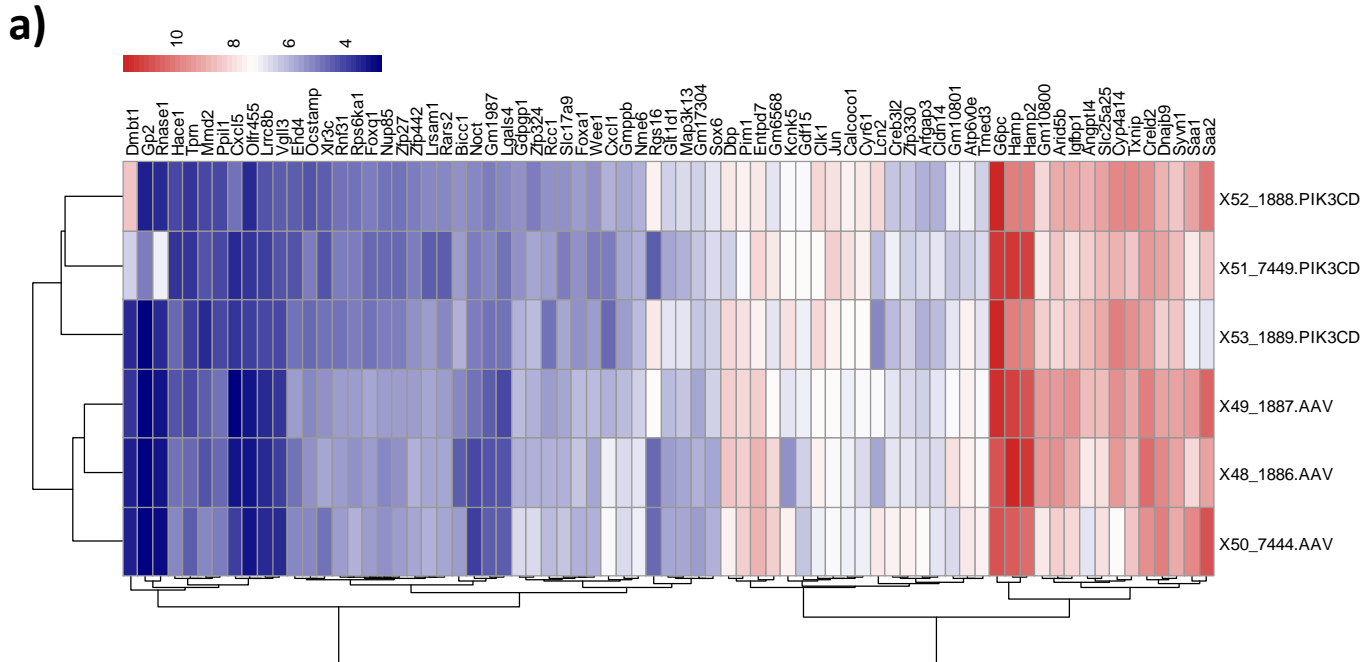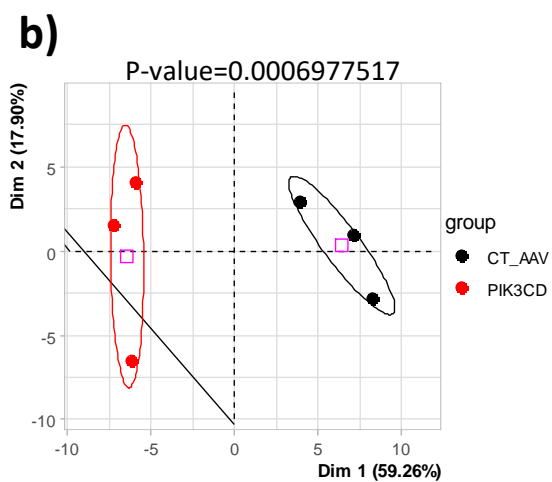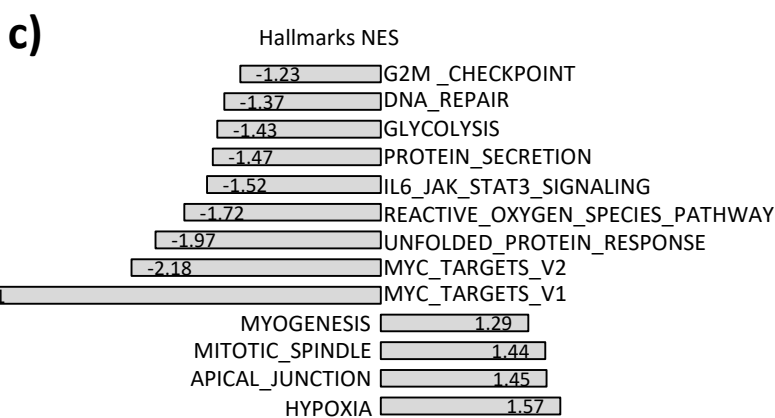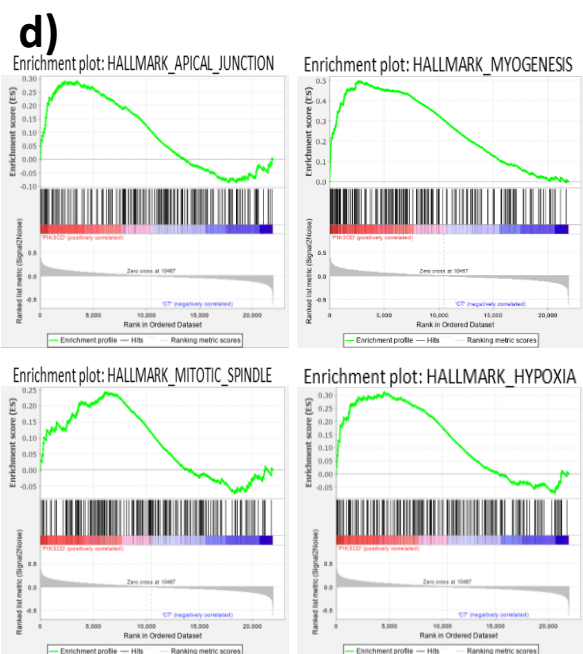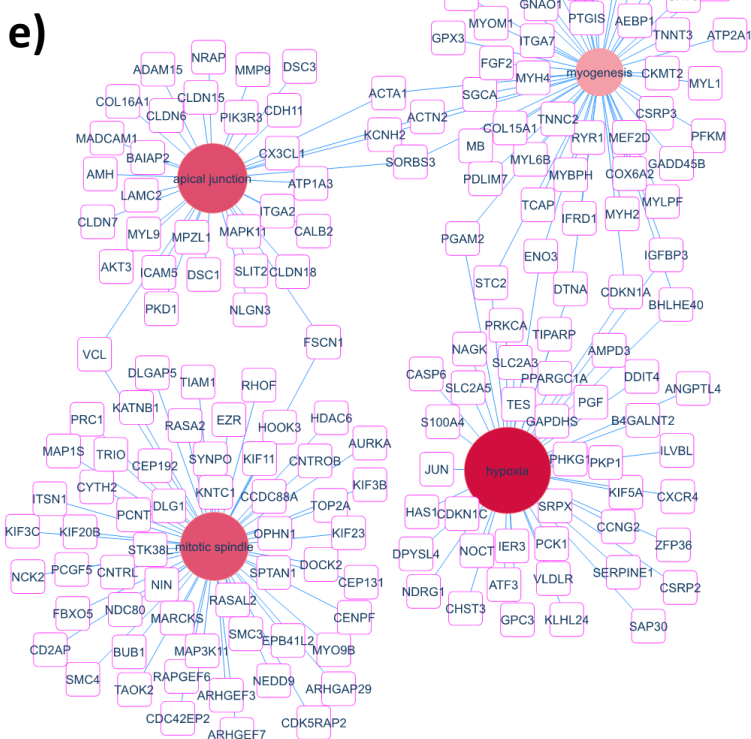

## **Supplementary Figure 10. PI3K $\delta$ tumor transfection impact on distinct cellular functions**

**a)** Heatmap of the genes regulated by PI3K $\delta$  and classification by Euclidean distances. **b)** Principal component analysis on PI3K $\delta$  regulated genes (p-value by Pearson correlation of group stratification). **c)** Barplot of gene set enrichment performed on hallmarks database from Broad Institute **d)** Hallmarks gene set up regulated in PI3K $\delta$  condition. **e)** Functional enriched network performed on Hallmarks cellular function up regulation in PI3K $\delta$  condition.

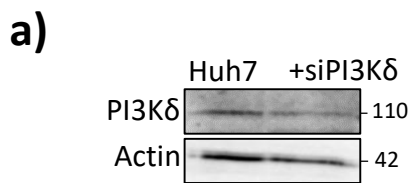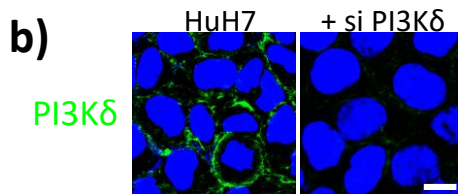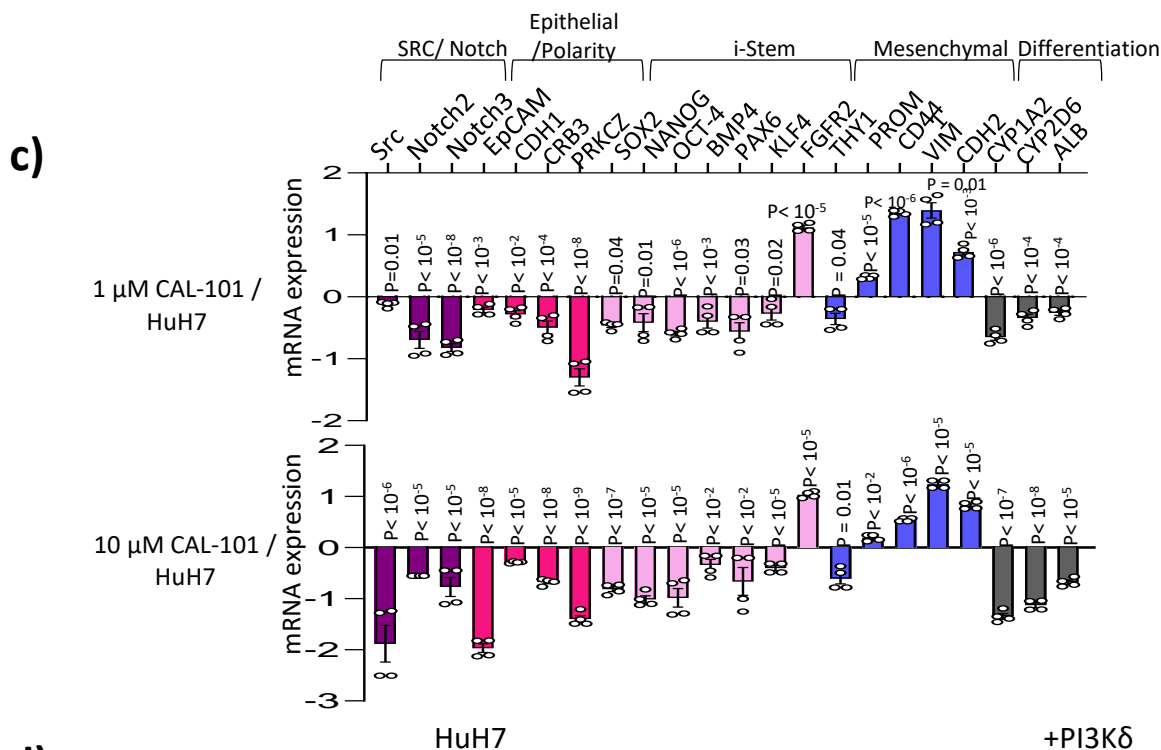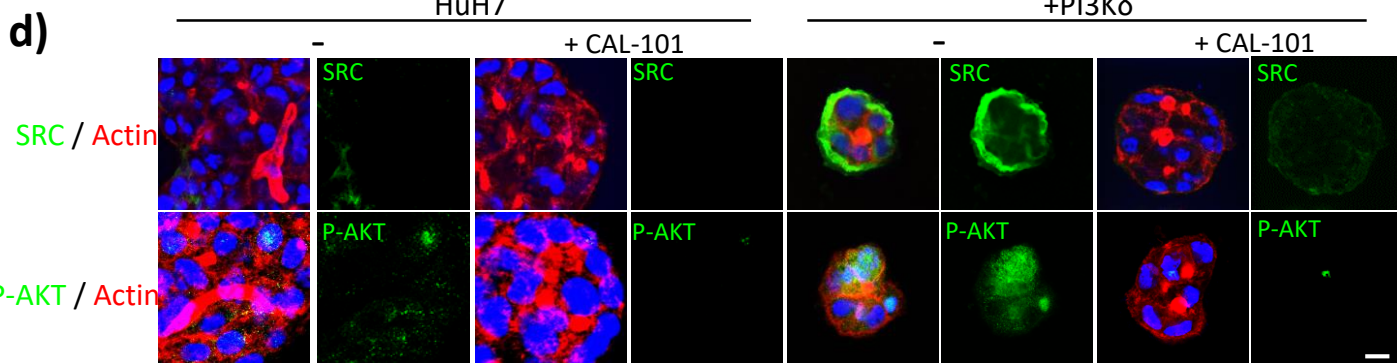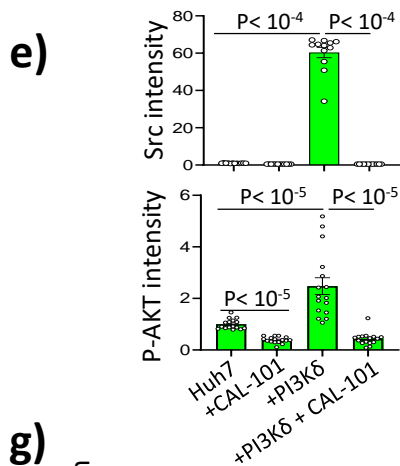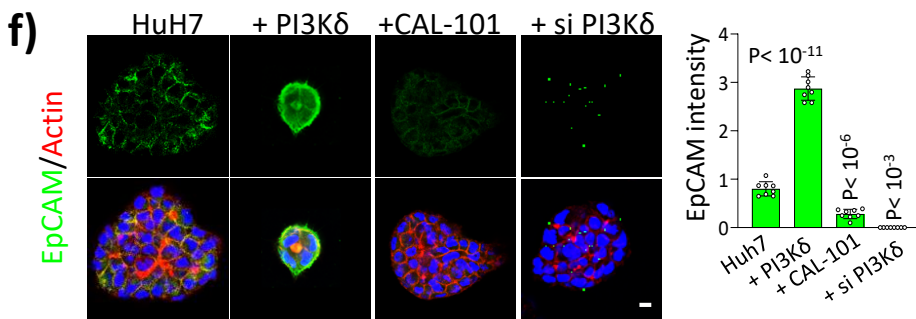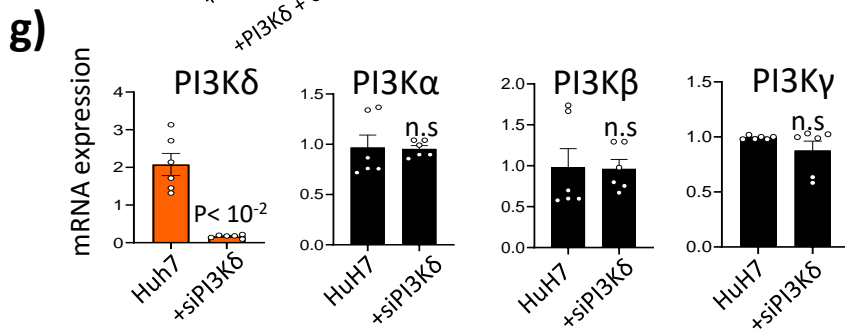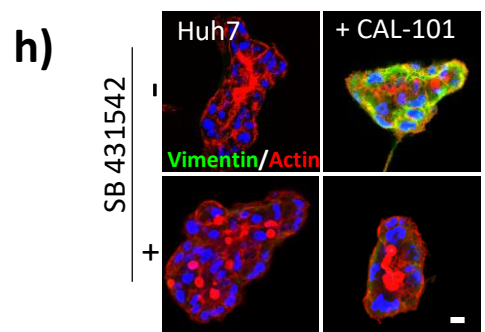

## **Supplementary Figure 11: Effects of PI3K $\delta$ inhibition in Huh7 cells morphology and EMT markers**

**a)** Immunoblot analysis of PI3K $\delta$  in Huh7 control and Huh7+siPI3K $\delta$ . **b)** Immunofluorescence staining for PI3K $\delta$  (green) in 2D culture of Huh7 control and Huh7+siPI3K $\delta$ . Scale bar: 10 $\mu$ m. **c)** RT-qPCR analysis of different genes expression performed in organoids of Huh7 control and Huh7+CAL-101 (1-10  $\mu$ M) after 6 days of 3D culture in two independent experiments performed in duplicate. Data are presented as  $\log_{10}$  mRNA fold change in the different conditions compared to Huh7 control. RPLP0 was used as the housekeeping gene for normalization. **d)** Immunofluorescence staining after 6 days of 3D culture for Src and p-AKT (green), actin microfilaments using phalloidin (red) and nuclei (blue) in Huh7 control and Huh7+PI3K $\delta$  organoids treated or not with CAL-101 at 5  $\mu$ M. Scale bar: 10 $\mu$ m. **e)** Quantification of relative intensity of Src and p-AKT. Each dot of the graph corresponds to an organoid. **f)** Immunofluorescence staining for EpCAM (green), actin microfilaments using phalloidin (red) and nuclei (blue) as indicated in the panel in organoids of Huh7 control, Huh7+PI3K $\delta$ , Huh7+CAL-101 (5 $\mu$ M) and Huh7+siPI3K $\delta$  and quantification of relative intensity of EpCAM. Scale bar: 10 $\mu$ m. Each dot of the graph corresponds to an organoid. **g)** RT-qPCR analysis of the different class I PI3Ks isoforms expression performed in HuH7 control and Huh7+siPI3K $\delta$  in three independent experiments performed in duplicate. RPLP0 was used as the housekeeping gene for normalization. **h)** Immunofluorescence staining for vimentin (green), actin microfilaments using phalloidin (red) and nuclei (blue) in organoids of Huh7 and Huh7+CAL-101 (5 $\mu$ M) treated or not with 2  $\mu$ M of SB431542 during 6 days of 3D culture. Scale bar: 10  $\mu$ m. All values are expressed as mean $\pm$ S.E.M.

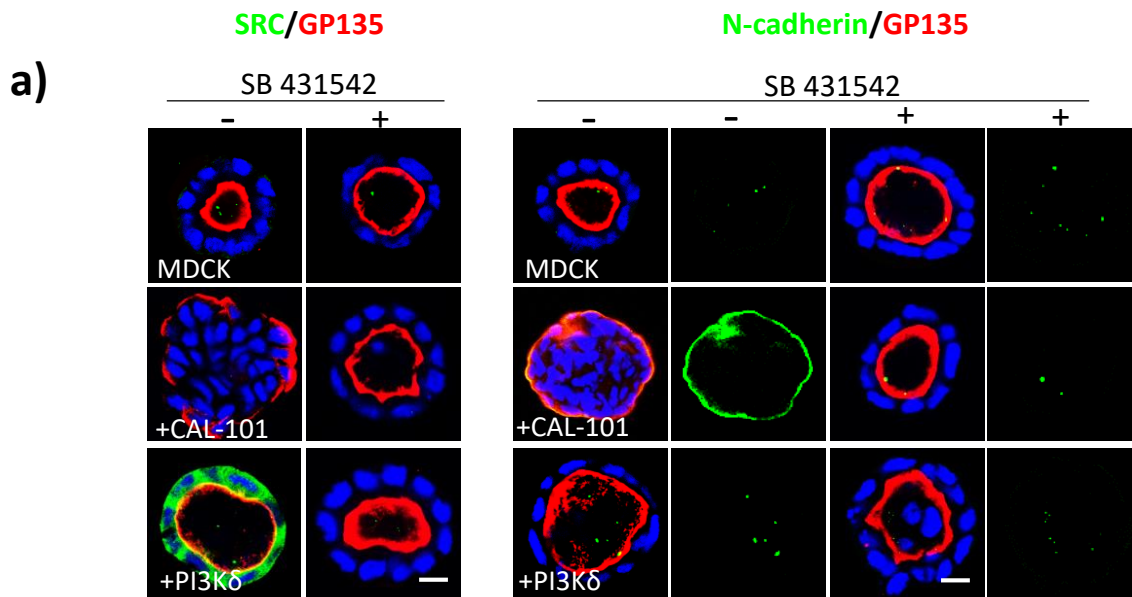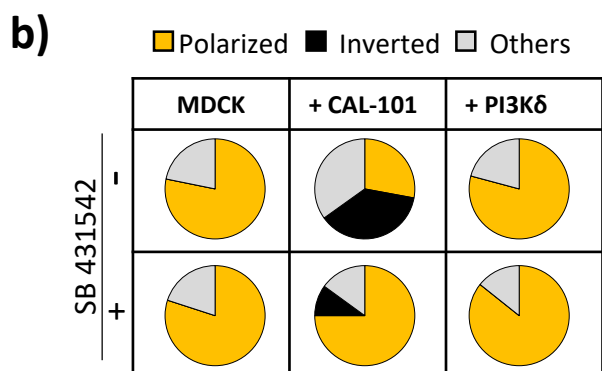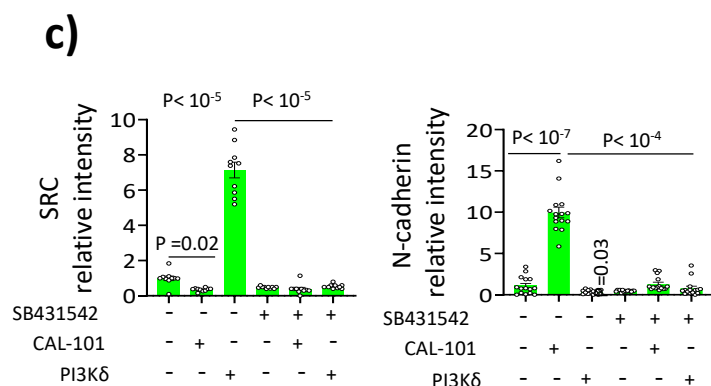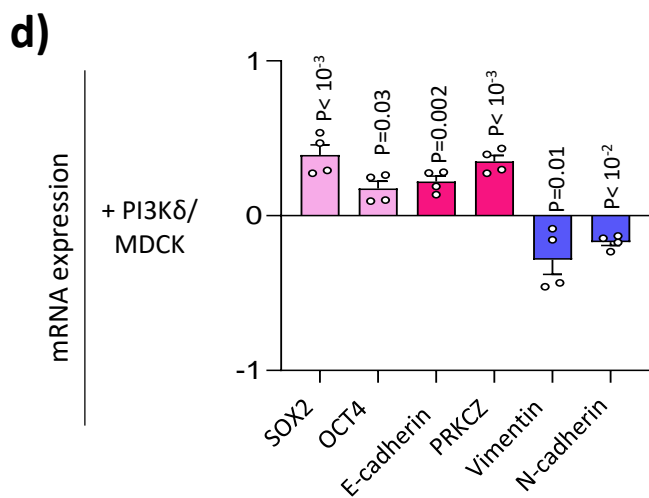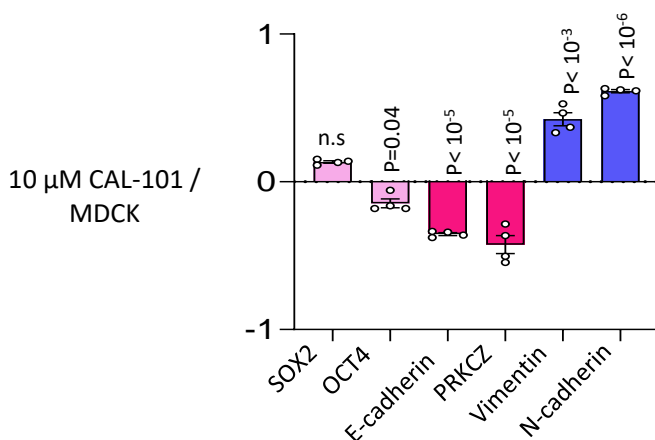

## **Supplementary Figure 12. Effects of PI3K $\delta$ activity modulation and TGF $\beta$ signaling pathway inhibition in MDCK organoids**

**a)** Immunofluorescence staining for Src and N-cadherin (green), GP135 (red) and nuclei (blue) in MDCK control, MDCK+PI3K $\delta$  and MDCK+CAL-101 (10  $\mu$ M) organoids after 6 days of 3D culture and treated with 2  $\mu$ M of SB431542. Scale bar: 10 $\mu$ m. **b)** Quantification of the phenotypes percentage in the different conditions. **c)** Quantification of Src and N-cadherin relative intensity in the different conditions presented in **(a)** each dot of the graph corresponds to an organoid. **d)** RT-qPCR analysis of different genes expression performed in MDCK control, MDCK+PI3K $\delta$  and MDCK+CAL-101 (10  $\mu$ M) organoids after 6 days of 3D culture in two independent experiments performed in duplicate. Data are presented as  $\log_{10}$  mRNA fold change in the different conditions compared to MDCK. Canis-GAPDH was used as the housekeeping gene for normalization. All values are expressed as mean $\pm$ S.E.M.



a)

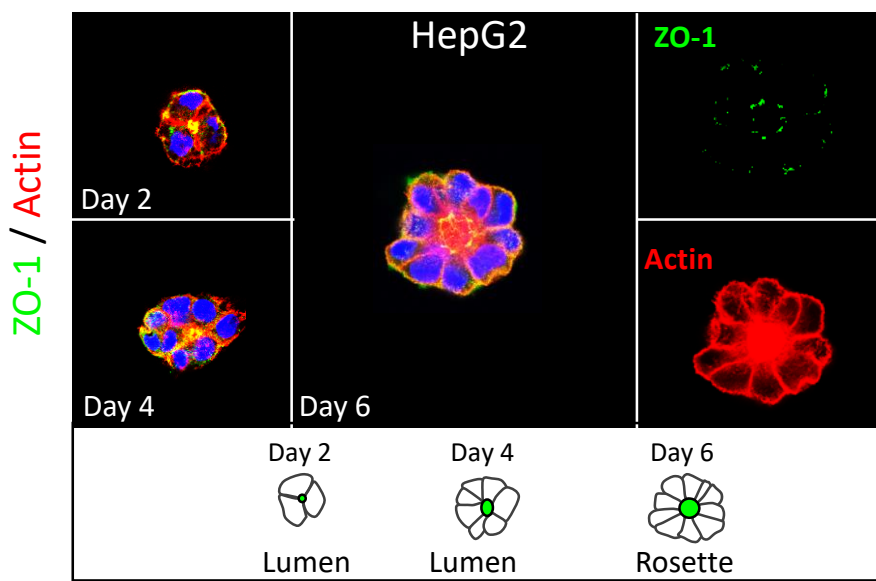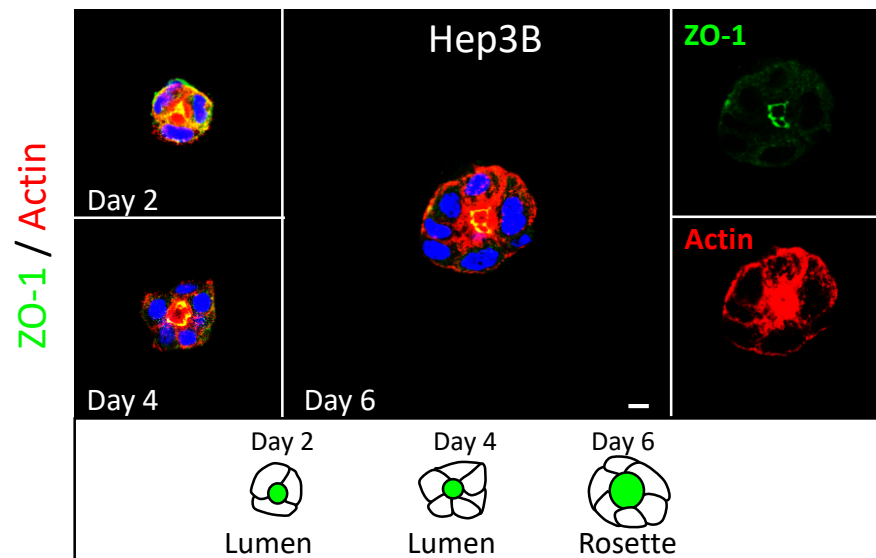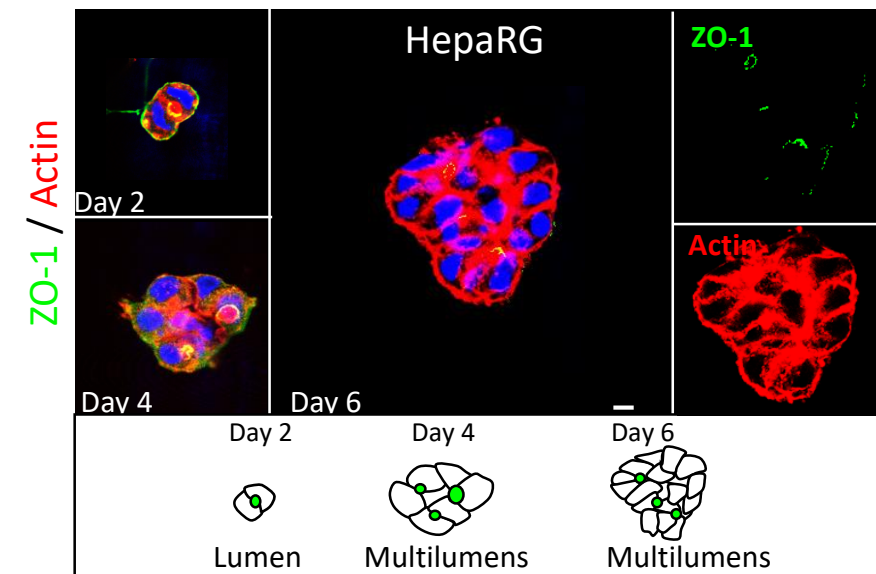

b)

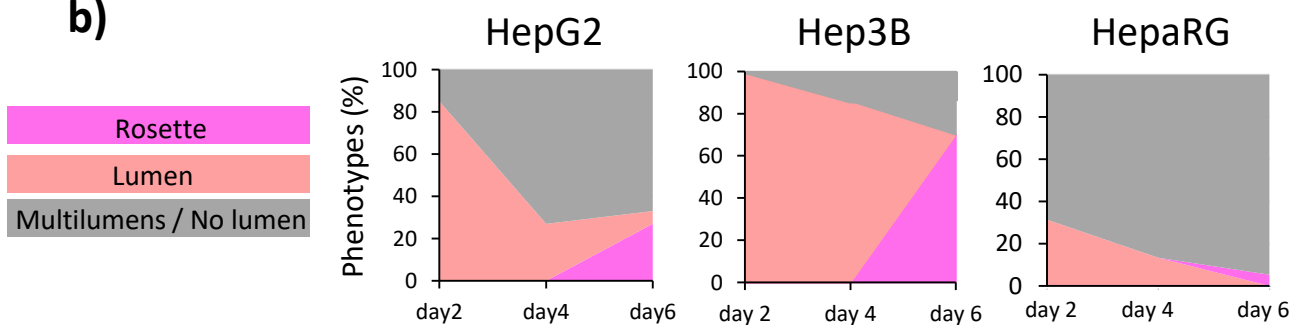

### **Supplementary Figure 13. Lumen formation kinetics in different hepatic cell lines**

**a)** Time-course analysis of lumen formation in HepG2, Hep3B and HepaRG plated in 3D Matrigel-matrix and stained after 2, 4 or 6 days for Zonula-occludens 1 (ZO-1, green), actin microfilaments using phalloidin (red) and nuclei using Hoechst (blue). Scale bar: 10  $\mu\text{m}$ . **b)** Quantification of the phenotypes percentage over the days of 3D culture. All values are expressed as mean $\pm$ S.E.M.

a)

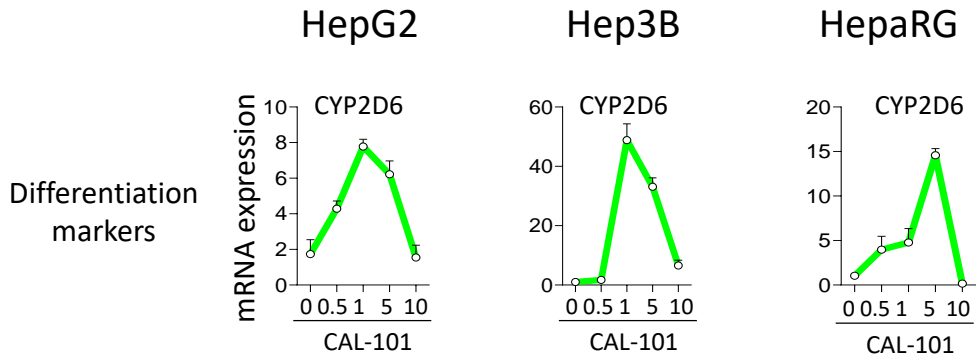

b)

| HepG2      | 0.5                | 1                  | 5                  | 10                 |
|------------|--------------------|--------------------|--------------------|--------------------|
| Albumin    | P=0.01             | P<10 <sup>-7</sup> | P<10 <sup>-7</sup> | n.s                |
| CYP1A2     | P<10 <sup>-2</sup> | P<10 <sup>-5</sup> | P<10 <sup>-6</sup> | n.s                |
| SOX2       | P<10 <sup>-6</sup> | P<10 <sup>-6</sup> | P<10 <sup>-6</sup> | P<10 <sup>-6</sup> |
| Nanog      | P<10 <sup>-4</sup> | P<10 <sup>-3</sup> | P<10 <sup>-3</sup> | P<10 <sup>-3</sup> |
| CD44       | n.s                | n.s                | n.s                | P=0.01             |
| N-cadherin | n.s                | n.s                | n.s                | P<10 <sup>-3</sup> |
| smad7      | P=0.03             | P<10 <sup>-6</sup> | P=0.02             | P<10 <sup>-7</sup> |
| Smad3      | n.s                | n.s                | P=0.04             | P<10 <sup>-3</sup> |
| CYP2D6     | P=0.02             | P<10 <sup>-3</sup> | P<10 <sup>-2</sup> | n.s                |

| Hep3B      | 0.5                | 1                  | 5                  | 10                  |
|------------|--------------------|--------------------|--------------------|---------------------|
| Albumin    | P=0.03             | P<10 <sup>-5</sup> | P<10 <sup>-3</sup> | n.s                 |
| CYP1A2     | n.s                | P<10 <sup>-6</sup> | P<10 <sup>-5</sup> | n.s                 |
| SOX2       | P<10 <sup>-2</sup> | P<10 <sup>-2</sup> | P<10 <sup>-6</sup> | P=0.03              |
| Nanog      | P<10 <sup>-3</sup> | P<10 <sup>-2</sup> | P<10 <sup>-3</sup> | P<10 <sup>-3</sup>  |
| CD44       | n.s                | P=0.02             | P=0.01             | P<10 <sup>-3</sup>  |
| N-cadherin | n.s                | n.s                | n.s                | P<10 <sup>-3</sup>  |
| smad7      | P<10 <sup>-3</sup> | P<10 <sup>-3</sup> | P<10 <sup>-3</sup> | P<10 <sup>-37</sup> |
| Smad3      | P<10 <sup>-3</sup> | P<10 <sup>-2</sup> | P=0.04             | P=0.03              |
| CYP2D6     | P=0.05             | P<10 <sup>-3</sup> | P<10 <sup>-3</sup> | P=0.05              |

| HepaRG     | 0.5                | 1                  | 5                  | 10                 |
|------------|--------------------|--------------------|--------------------|--------------------|
| Albumin    | P<10 <sup>-6</sup> | P=0.004            | P<10 <sup>-6</sup> | P<10 <sup>-5</sup> |
| CYP1A2     | P=0.05             | P<10 <sup>-3</sup> | P<10 <sup>-6</sup> | P=0.03             |
| SOX2       | P=0.01             | P<10 <sup>-3</sup> | P<10 <sup>-3</sup> | P<10 <sup>-6</sup> |
| Nanog      | P<10 <sup>-5</sup> | P<10 <sup>-7</sup> | P<10 <sup>-7</sup> | P=0.03             |
| CD44       | n.s                | n.s                | n.s                | P<10 <sup>-3</sup> |
| N-cadherin | n.s                | n.s                | n.s                | P<10 <sup>-3</sup> |
| smad7      | P<10 <sup>-3</sup> | P<10 <sup>-3</sup> | P=0.04             | P=0.03             |
| Smad3      | n.s                | n.s                | n.s                | P=0.02             |
| CYP2D6     | n.s                | P=0.04             | P<10 <sup>-7</sup> | P<10 <sup>-3</sup> |

**Supplementary Figure 14. The inhibition of PI3K $\delta$  activity increases hepatocyte differentiation genes in different cell lines.**

a) RT-qPCR analysis of CYP2D6 expression in HepG2, Hep3B and HepaRG cells plated in 3D culture and treated with different doses of CAL-101 after 6 days in two independent experiments performed in duplicate; RPLP0 was used as the housekeeping gene for normalization. b) Table representing the p-values of the different genes expression between the organoids treated at different doses of CAL-101 and untreated organoids in the different used cell lines measured by RT-qPCR corresponding to graph presented in figure 6 (panel e) and the panel (a) of the supplementary figure 13. All values are expressed as mean $\pm$ S.E.M.

**a)**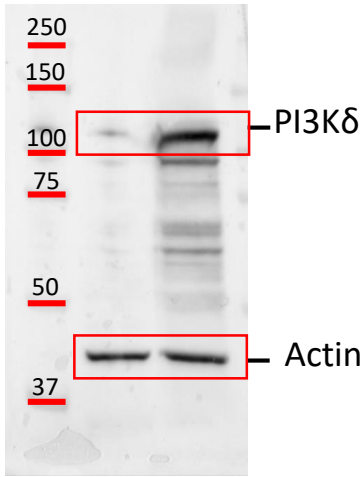**b)**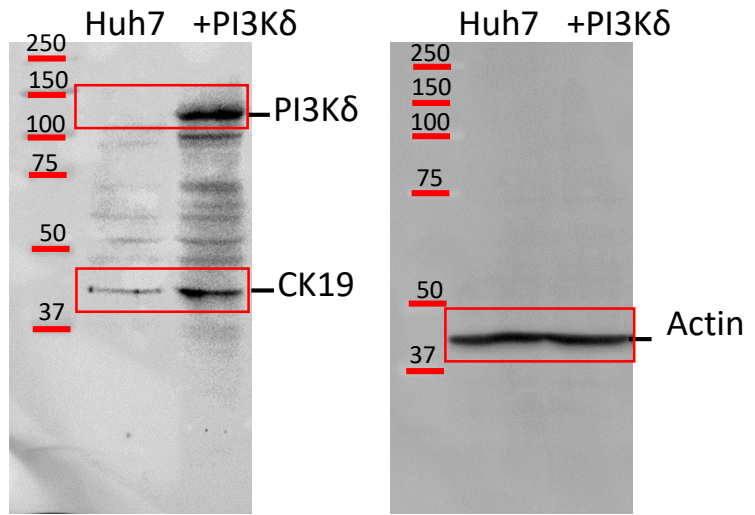**c)**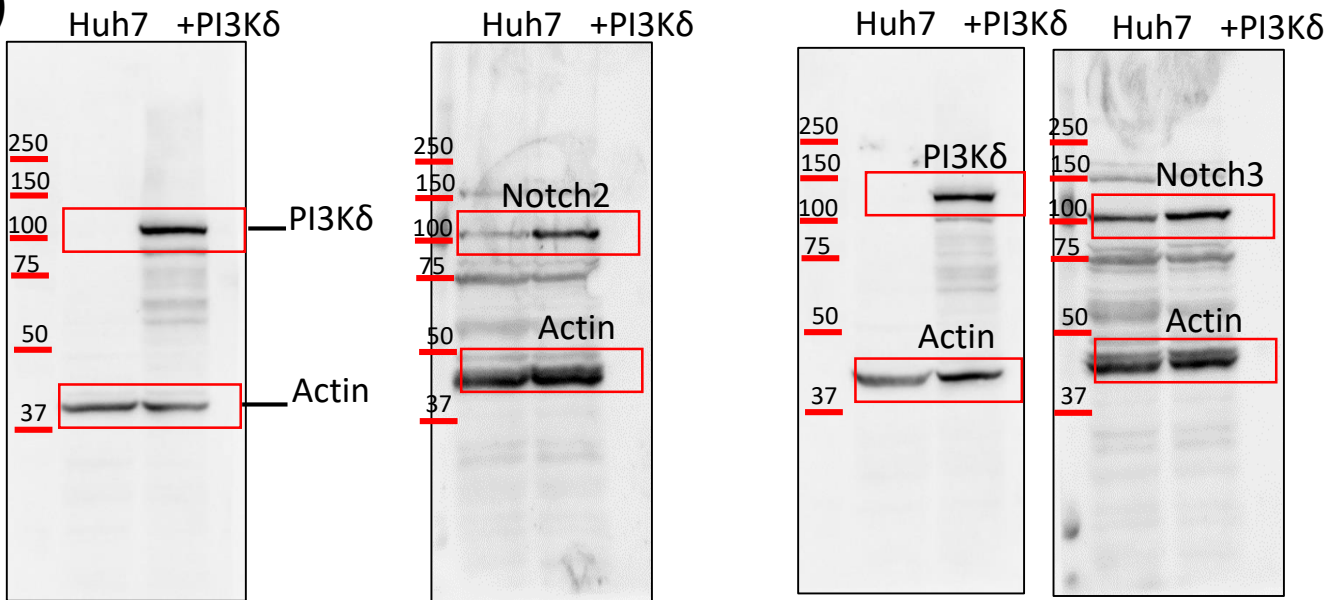**d)**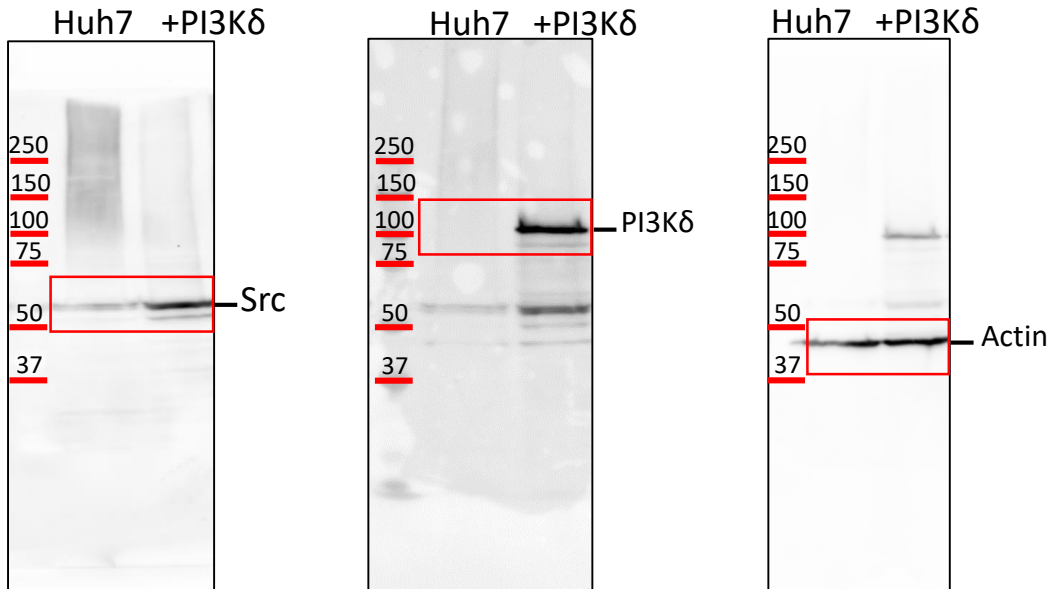

**Supplementary Figure 15.** Original full blots for the cropped images shown in Supplementary Fig.1a and Fig.2d, Fig.3f **a)** PI3K $\delta$  and  $\beta$ -actin **b)** PI3K $\delta$ , CK19 and  $\beta$ -actin **c)** PI3K $\delta$ , Notch2,  $\beta$ -actin and PI3K $\delta$ , Notch3 and  $\beta$ -actin. **d)** Src, PI3K $\delta$  and  $\beta$ -actin

a)

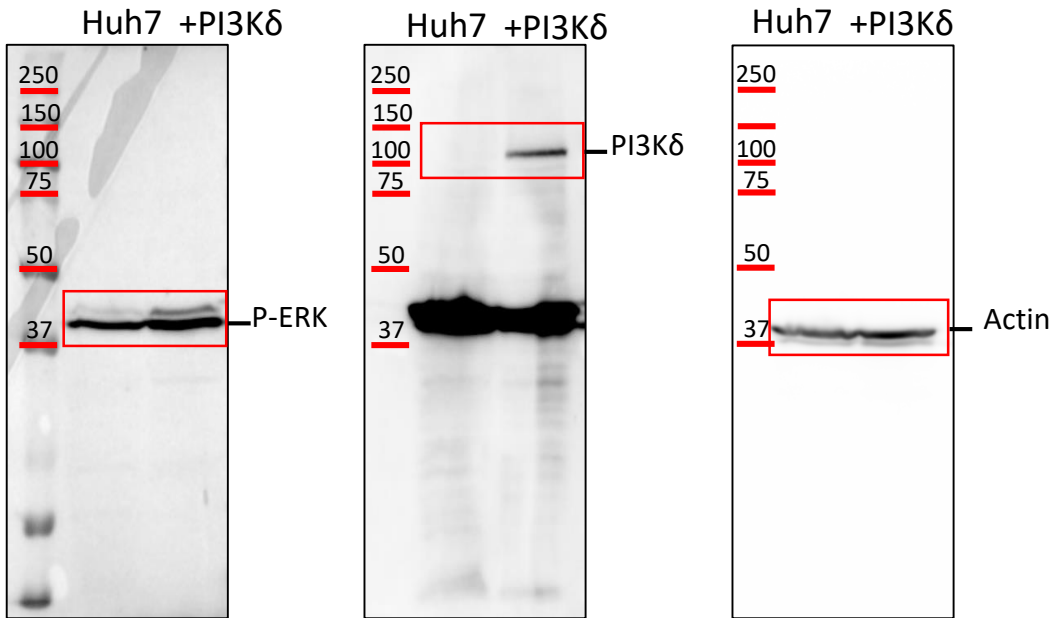

b)

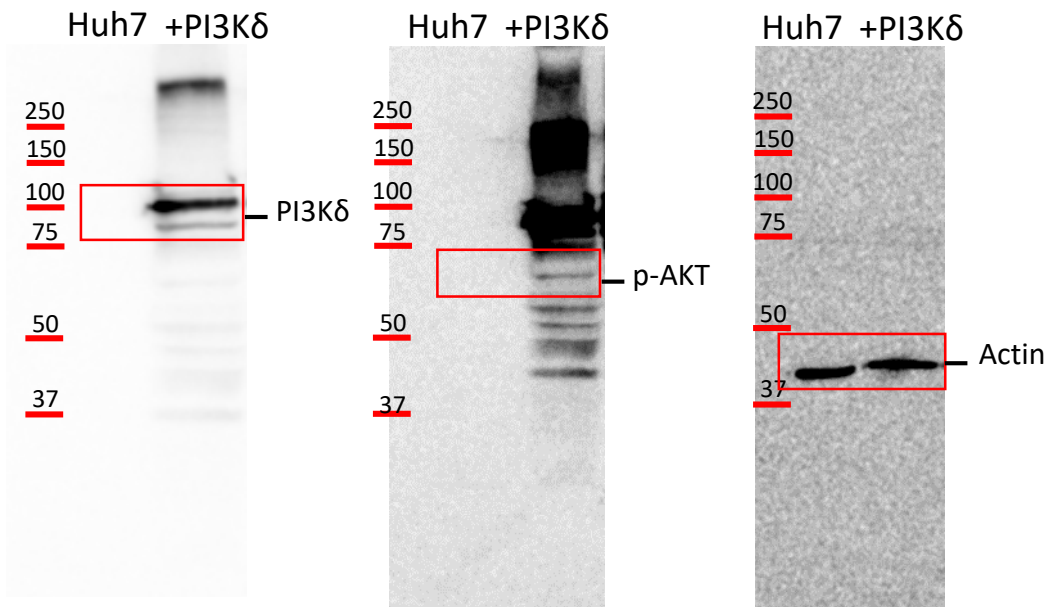

c)

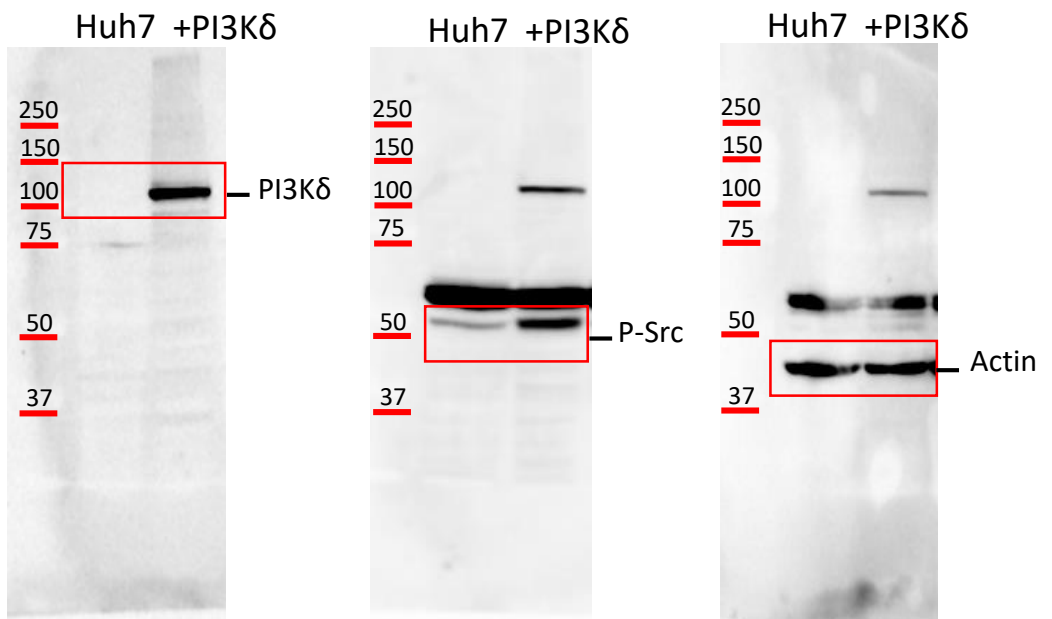

**Supplementary Figure 16.** Original full blots for the cropped images shown in Supplementary Fig.7c and e **a)** p-ERK, PI3K $\delta$  and  $\beta$ -actin. **b)** p-AKT, PI3K $\delta$  and  $\beta$ -actin **c)** p-Src, PI3K $\delta$  and  $\beta$ -actin



**a)**

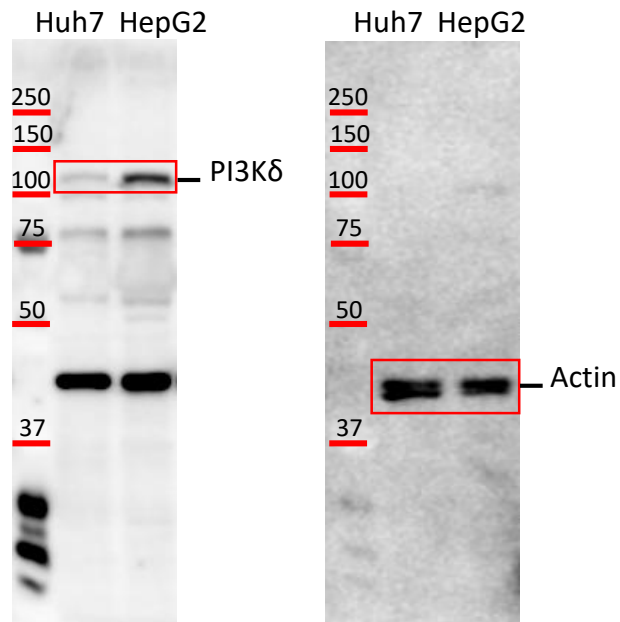

**b)**

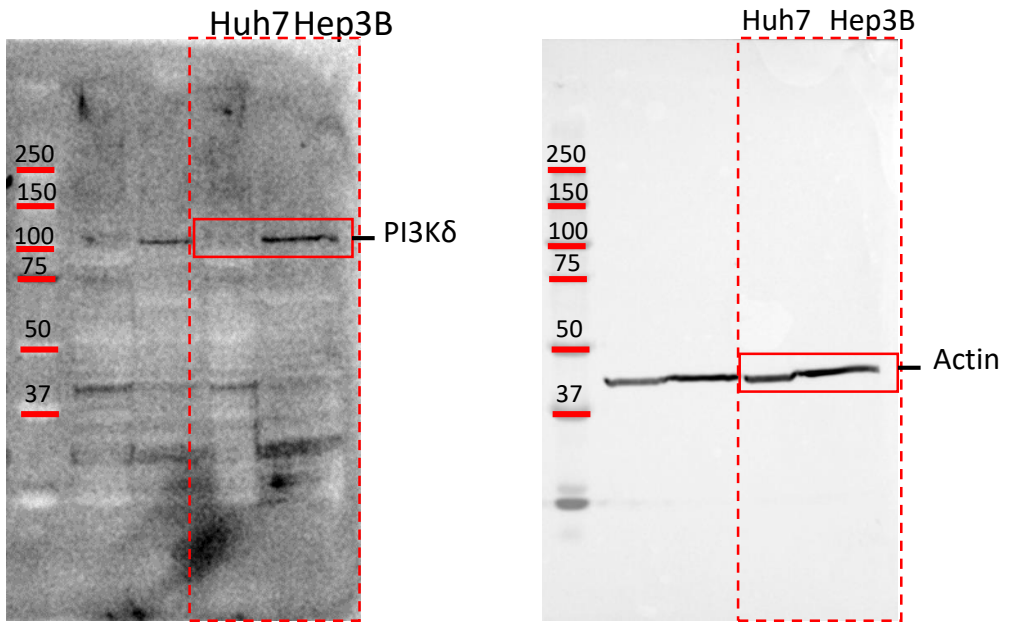

**c)**

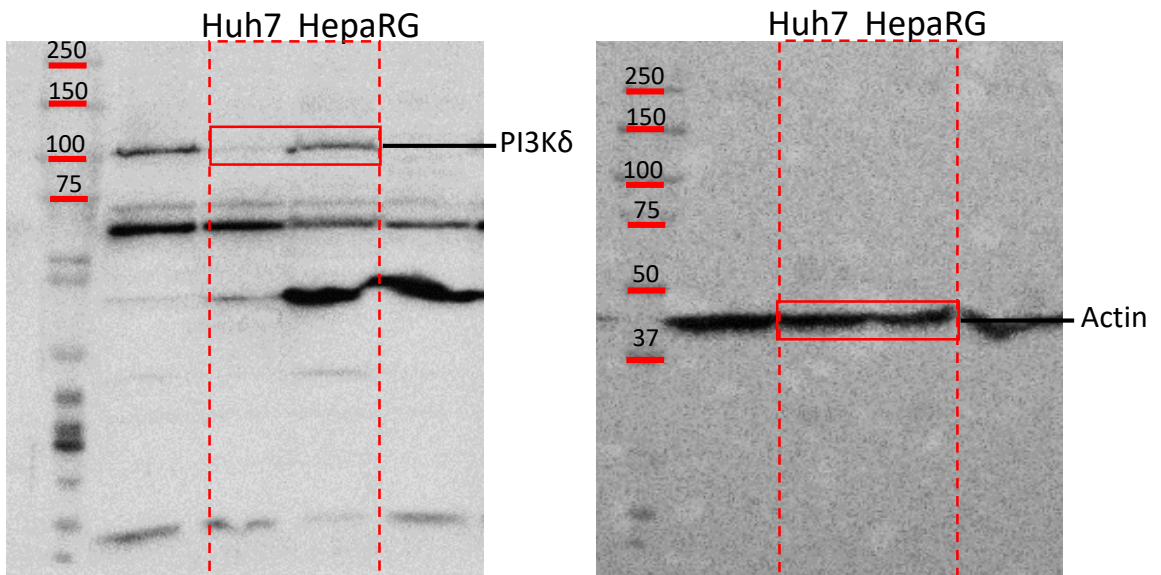

**Supplementary Figure 17.** Original full blots for the cropped images shown in Fig.6a **a)** PI3K $\delta$  and  $\beta$ -actin **b)** PI3K $\delta$  and  $\beta$ -actin **c)** PI3K $\delta$  and  $\beta$ -actin.

a)

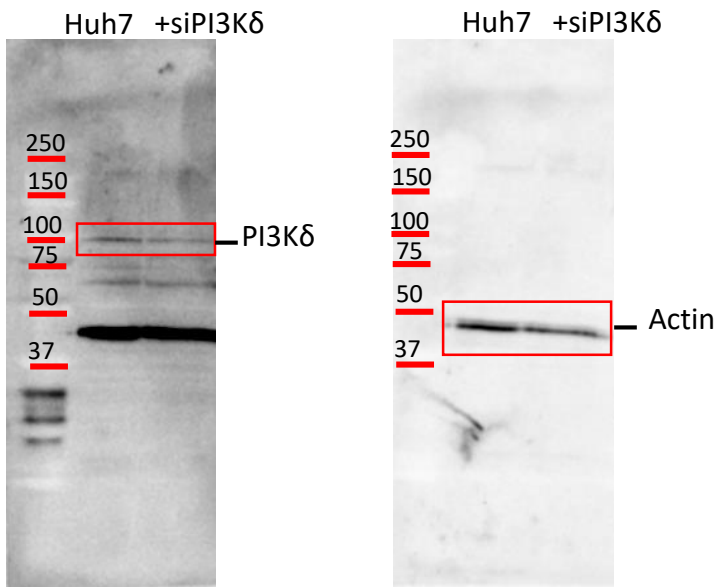

**Supplementary Figure 18.** Original full blots for the cropped images shown in Supplementary Fig.11a  
a) PI3K $\delta$  and  $\beta$ -actin
