# Supplementary material for: PI3Kδ activity controls plasticity and discriminates between EMT and stemness based on distinct TGFβ signaling
Source: PubMed Central journal article supplement (PMC9314410; doi:10.1038/s42003-022-03637-w), 2022-07-25
Supplement: 42003_2022_3637_MOESM2_ESM.pdf [file 42003_2022_3637_MOESM2_ESM.pdf]

## Description of Additional Supplementary Files

**File name:** Supplementary Data 1

**Description:** Regulated genes in transcriptome from PI3K $\delta$  overexpression in Huh7 cells versus control cells.

**File name:** Supplementary Data 2

**Description:** Regulated genes in transcriptome of mouse liver infected with AAV8-PIK3CD vector versus empty vector.

**File name:** Supplementary Data 3

**Description:** List of antibodies.

**File name:** Supplementary Data 4

**Description:** List of primers used for RT-qPCR

**File name:** Supplementary Data 5

**Description:** All source data for the graphs and charts presented in the main and supplementary figures.
